# Supplementary material
Source: publisher figshare collection journal article supplement (https://sage.figshare.com/ndownloader/files/20780226)
Supplement: Supplementary file 1 [file 20780226]

# Supplementary Materials

## Who Uses Fact-Checking Sites? The Impact of Demographics, Political Antecedents, and Media Use on Fact-Checking Site Awareness, Attitudes, and Behavior

**Table 1. Hierarchical regression predicting familiarity with fact-checking sites (unstandardized and standardized coefficients)**

|                             | Step 1   |        |         | Step 2 |        |         | Step 3 |        |         |
|-----------------------------|----------|--------|---------|--------|--------|---------|--------|--------|---------|
|                             | B        | (SE)   | $\beta$ | B      | (SE)   | $\beta$ | B      | (SE)   | $\beta$ |
| (Constant)                  | 3.04     | (.23)  |         | .36    | (.27)  |         | .26    | (.29)  |         |
| Age                         | -.03     | (.004) | -.21*** | -.02   | (.004) | -.16*** | -.01   | (.004) | -.10**  |
| Female                      | -.80     | (.12)  | -.19*** | -.48   | (.11)  | -.12*** | -.42   | (.11)  | -.10*** |
| Education                   | .41      | (.06)  | .24***  | .24    | (.05)  | .14***  | .19    | (.05)  | .11***  |
| Income                      | .09      | (.05)  | .05     | -.03   | (.05)  | -.02    | -.04   | (.05)  | -.02    |
| White                       | .05      | (.15)  | .01     | .26    | (.13)  | .05*    | .25    | (.13)  | .05     |
| $\Delta R^2$                | .164***  |        |         |        |        |         |        |        |         |
| F                           | 40.28*** |        |         |        |        |         |        |        |         |
| Political interest          |          |        |         | .28    | (.06)  | .16***  | .26    | (.06)  | .15***  |
| Political efficacy          |          |        |         | .16    | (.03)  | .14***  | .15    | (.03)  | .14***  |
| Political ideology          |          |        |         | .09    | (.02)  | .12***  | .05    | (.02)  | .07*    |
| Political discussion        |          |        |         | .21    | (.03)  | .24***  | .16    | (.03)  | .19***  |
| $\Delta R^2$                | .192***  |        |         |        |        |         |        |        |         |
| F                           | 62.83*** |        |         |        |        |         |        |        |         |
| Liberal/mainstream news use |          |        |         |        |        |         | .55    | (.08)  | .28***  |
| Local/broadcast news use    |          |        |         |        |        |         | -.27   | (.06)  | -.14*** |
| Conservative news use       |          |        |         |        |        |         | -.03   | (.07)  | -.02    |
| $\Delta R^2$                | .031***  |        |         |        |        |         |        |        |         |
| F                           | 53.60*** |        |         |        |        |         |        |        |         |
| Total $R^2$                 | .387     |        |         |        |        |         |        |        |         |
| N =                         | 1033     |        |         |        |        |         |        |        |         |

\*\*\*  $p < .001$ , \*\*  $p < .01$ , \*  $p < .05$

**Table 2. Hierarchical regression analysis predicting general attitudes towards fact-checking sites (unstandardized and standardized coefficients)**

|                             | Step 1   |        |         | Step 2 |        |         | Step 3 |        |         |
|-----------------------------|----------|--------|---------|--------|--------|---------|--------|--------|---------|
|                             | B        | (SE)   | $\beta$ | B      | (SE)   | $\beta$ | B      | (SE)   | $\beta$ |
| (Constant)                  | 3.33     | (.12)  |         | 1.38   | (.25)  |         | 1.57   | (.27)  |         |
| Age                         | -.01     | (.003) | -.13*** | -.01   | (.003) | -.11*** | -.01   | (.003) | -.09**  |
| Female                      | -.21     | (.11)  | -.06*   | -.02   | (.01)  | -.01    | -.01   | (.01)  | -.003   |
| Education                   | .19      | (.05)  | .13***  | .07    | (.05)  | .05     | .04    | (.05)  | .03     |
| Income                      | .13      | (.05)  | .10**   | .07    | (.04)  | .05     | .06    | (.04)  | .05     |
| White                       | .31      | (.13)  | .08*    | .48    | (.12)  | .12***  | .48    | (.12)  | .12***  |
| $\Delta R^2$                | .065***  |        |         |        |        |         |        |        |         |
| F                           | 14.31*** |        |         |        |        |         |        |        |         |
| Political interest          |          |        |         | .26    | (.05)  | .18***  | .24    | (.05)  | .17***  |
| Political efficacy          |          |        |         | .12    | (.03)  | .14***  | .12    | (.03)  | .14***  |
| Political ideology          |          |        |         | .10    | (.02)  | .17***  | .05    | (.02)  | .08*    |
| Political discussion        |          |        |         | .07    | (.03)  | .09*    | .05    | (.03)  | .07     |
| $\Delta R^2$                | .131***  |        |         |        |        |         |        |        |         |
| F                           | 27.74*** |        |         |        |        |         |        |        |         |
| Liberal/mainstream news use |          |        |         |        |        |         | .40    | (.08)  | .25***  |
| Local/broadcast news use    |          |        |         |        |        |         | -.09   | (.06)  | -.06    |
| Conservative news use       |          |        |         |        |        |         | -.23   | (.06)  | -.15*** |
| $\Delta R^2$                | .022***  |        |         |        |        |         |        |        |         |
| F                           | 23.77*** |        |         |        |        |         |        |        |         |
| Total $R^2$                 | .219     |        |         |        |        |         |        |        |         |
| N =                         | 1033     |        |         |        |        |         |        |        |         |

\*\*\*  $p < .001$ , \*\*  $p < .01$ , \*  $p < .05$

**Table 3. Hierarchical regression analysis predicting perceived usefulness of fact-checking sites (unstandardized and standardized coefficients)**

|                             | Step 1   |        |         | Step 2 |        |         | Step 3 |        |         |
|-----------------------------|----------|--------|---------|--------|--------|---------|--------|--------|---------|
|                             | B        | (SE)   | $\beta$ | B      | (SE)   | $\beta$ | B      | (SE)   | $\beta$ |
| (Constant)                  | 3.74     | (.17)  |         | 2.28   | (.21)  |         | 2.45   | (.23)  |         |
| Age                         | -.01     | (.003) | -.07*   | -.01   | (.003) | -.06*   | -.01   | (.003) | -.06    |
| Female                      | -.02     | (.09)  | -.01    | .12    | (.09)  | .04     | .12    | (.08)  | .04     |
| Education                   | .11      | (.04)  | .10**   | .02    | (.04)  | .02     | .01    | (.04)  | .01     |
| Income                      | .09      | (.04)  | .09*    | .05    | (.04)  | .05     | .04    | (.04)  | .04     |
| White                       | -.01     | (.11)  | -.002   | .12    | (.10)  | .04     | .13    | (.10)  | .04     |
| $\Delta R^2$                | .030***  |        |         |        |        |         |        |        |         |
| F                           | 6.4***   |        |         |        |        |         |        |        |         |
| Political interest          |          |        |         | .27    | (.05)  | .23***  | .25    | (.05)  | .21***  |
| Political efficacy          |          |        |         | .06    | (.03)  | .08*    | .06    | (.03)  | .08*    |
| Political ideology          |          |        |         | .09    | (.02)  | .17***  | .03    | (.02)  | .06     |
| Political discussion        |          |        |         | .02    | (.02)  | .04     | .01    | (.03)  | .02     |
| $\Delta R^2$                | .113***  |        |         |        |        |         |        |        |         |
| F                           | 19.02*** |        |         |        |        |         |        |        |         |
| Liberal/mainstream news use |          |        |         |        |        |         | .33    | (.07)  | .24***  |
| Local/broadcast news use    |          |        |         |        |        |         | .02    | (.05)  | .01     |
| Conservative news use       |          |        |         |        |        |         | -.26   | (.05)  | -.20*** |
| $\Delta R^2$                | .028***  |        |         |        |        |         |        |        |         |
| F                           | 17.62*** |        |         |        |        |         |        |        |         |
| Total $R^2$                 | .172     |        |         |        |        |         |        |        |         |
| N =                         | 1033     |        |         |        |        |         |        |        |         |

\*\*\*  $p < .001$ , \*\*  $p < .01$ , \*  $p < .05$

**Table 4. Hierarchical regression analysis of predicting frequency of visiting fact-checking sites (unstandardized and standardized coefficients)**

|                             | Step 1   |        |         | Step 2 |        |         | Step 3 |        |         |
|-----------------------------|----------|--------|---------|--------|--------|---------|--------|--------|---------|
|                             | B        | (SE)   | $\beta$ | B      | (SE)   | $\beta$ | B      | (SE)   | $\beta$ |
| (Constant)                  | 1.21     | (.12)  |         | -.18   | (.14)  |         | -.35   | (.16)  |         |
| Age                         | -.01     | (.002) | -.21*** | -.01   | (.002) | -.14*** | -.01   | (.002) | -.07*   |
| Female                      | -.22     | (.06)  | -.10**  | -.06   | (.06)  | -.03    | -.02   | (.06)  | -.01    |
| Education                   | .17      | (.03)  | .19***  | .07    | (.03)  | .08**   | .05    | (.03)  | .05     |
| Income                      | .06      | (.03)  | .08*    | .01    | (.03)  | .01     | -.003  | (.02)  | -.003   |
| White                       | .02      | (.08)  | .01     | .13    | (.07)  | .05     | .14    | (.07)  | .05*    |
| $\Delta R^2$                | .110***  |        |         |        |        |         |        |        |         |
| F                           | 25.44*** |        |         |        |        |         |        |        |         |
| Political interest          |          |        |         | .16    | (.03)  | .18***  | .14    | (.03)  | .15***  |
| Political efficacy          |          |        |         | .04    | (.02)  | .06     | .03    | (.02)  | .05     |
| Political ideology          |          |        |         | .05    | (.01)  | .13***  | .03    | (.01)  | .07*    |
| Political discussion        |          |        |         | .13    | (.02)  | .29***  | .09    | (.02)  | .20***  |
| $\Delta R^2$                | .196***  |        |         |        |        |         |        |        |         |
| F                           | 50.10*** |        |         |        |        |         |        |        |         |
| Liberal/mainstream news use |          |        |         |        |        |         | .32    | (.05)  | .31***  |
| Local/broadcast news use    |          |        |         |        |        |         | -.11   | (.03)  | -.11**  |
| Conservative news use       |          |        |         |        |        |         | .01    | (.04)  | .01     |
| $\Delta R^2$                | .040***  |        |         |        |        |         |        |        |         |
| F                           | 44.88*** |        |         |        |        |         |        |        |         |
| Total $R^2$                 | .346     |        |         |        |        |         |        |        |         |
| N =                         | 1033     |        |         |        |        |         |        |        |         |

\*\*\*  $p < .001$ , \*\*  $p < .01$ , \*  $p < .05$

**Table 5. Demographic comparisons between study sample, American Community Survey, and Pew Research Center data**

|                                     | Study sample<br>(2017) | 2013-2017<br>American<br>Community Survey<br>5-Year Estimates <sup>1</sup> | Pew 2017<br>(unweighted) <sup>2</sup> | Pew<br>2016 <sup>3</sup> |
|-------------------------------------|------------------------|----------------------------------------------------------------------------|---------------------------------------|--------------------------|
| <b>Age</b>                          |                        |                                                                            |                                       |                          |
| 20-24                               | 7.3%                   | 7%                                                                         | 6.9%                                  |                          |
| 25-34                               | 16.6%                  | 13.7%                                                                      | 16%                                   |                          |
| 35-44                               | 16.6%                  | 12.7%                                                                      | 13.8%                                 |                          |
| 45-54                               | 17.9%                  | 13.4%                                                                      | 15.8%                                 |                          |
| 55-59                               | 7.8%                   | 6.7%                                                                       | 10.3%                                 |                          |
| 60-64                               | 11.9%                  | 6%                                                                         | 9.6%                                  |                          |
| 65+                                 | 19%                    | 14.9%                                                                      | 23.8%                                 |                          |
| <b>Gender (female)</b>              |                        |                                                                            |                                       |                          |
|                                     | 54.3%                  | 50.8%                                                                      | 44.9%                                 |                          |
| <b>Race (White)</b>                 |                        |                                                                            |                                       |                          |
|                                     | 78.2%                  | 75.7%                                                                      | 75.7%                                 |                          |
| <b>Education</b>                    |                        |                                                                            |                                       |                          |
| Less than high school               | 3.2%                   | 12.6%                                                                      | 5.4%                                  |                          |
| High school or GED                  | 28.1%                  | 27.3%                                                                      | 22.1%                                 |                          |
| Some college, associate's           | 36.6%                  | 29.1%                                                                      | 25.8%                                 |                          |
| Bachelor's degree                   | 21%                    | 19.1%                                                                      | 26%                                   |                          |
| Some postgraduate                   | 2.6%                   | —                                                                          | 1.6%                                  |                          |
| Postgraduate or professional degree | 8.5%                   | 11.8%                                                                      | 18.7%                                 |                          |
| Bachelor's or higher                | 32.1%                  | 30.9%                                                                      | 46.3%                                 |                          |
| <b>Income</b>                       |                        |                                                                            |                                       |                          |
| Less than \$25,000                  | 26.8%                  | 21.4%                                                                      |                                       |                          |
| \$25,000 - \$49,999                 | 29.3%                  | 22.5%                                                                      | 41.9% (up to \$50K)                   |                          |
| \$50,000 - \$74,999                 | 20.5%                  | 17.7%                                                                      | 12.5%                                 |                          |
| \$75,000 - \$99,999                 | 12.8%                  | 12.3%                                                                      | 12.4%                                 |                          |
| Over \$100,000                      | 10.5%                  | 26.2%                                                                      | 26.2%                                 |                          |
| <b>Party affiliation</b>            |                        |                                                                            |                                       |                          |
| Leans Republican                    | 29.7%                  | Republican                                                                 | 25%                                   | 29%                      |
| Independent                         | 30.6%                  | Independent                                                                | 41%                                   | 34%                      |
| Leans Democrat                      | 39.7%                  | Democrat                                                                   | 31%                                   | 33%                      |

<sup>1</sup>United States Census Bureau. 2017. "2013-2017 American Community Survey 5-Year Estimates." Retrieved from <https://factfinder.census.gov/>

<sup>2</sup>Pew Research Center. 2017. "April 2017 Political Survey." Retrieved from <https://www.people-press.org/dataset/april-2017-political-survey/>

<sup>3</sup>Pew Research Center. 2016. "2016 Party Identification Detailed Tables." Retrieved from <https://www.people-press.org/2016/09/13/2016-party-identification-detailed-tables/>

**Table 6. Factor analysis (principal components analysis and varimax rotation) of measures of media use**

|                                                                                          | Component    |              |              |
|------------------------------------------------------------------------------------------|--------------|--------------|--------------|
|                                                                                          | 1            | 2            | 3            |
| National newspapers (e.g., The New York Times; Washington Post; online or print)         | <b>0.780</b> | 0.201        | 0.118        |
| International news websites (e.g., BBC, The Guardian)                                    | <b>0.797</b> | 0.092        | 0.242        |
| CNN cable news programs (e.g., Anderson Cooper, Don Lemon)                               | <b>0.644</b> | 0.449        | 0.107        |
| Liberal news websites (e.g., Daily Kos, Mother Jones)                                    | <b>0.747</b> | 0.123        | 0.325        |
| MSNBC cable news programs (e.g., Rachel Maddow, Chris Matthews)                          | <b>0.689</b> | 0.346        | 0.197        |
| News programming on NPR -- live radio, podcasts, streaming (e.g., All Things Considered) | <b>0.708</b> | 0.118        | 0.315        |
| National nightly news on CBS, ABC, or NBC                                                | 0.234        | <b>0.832</b> | 0.042        |
| The Today Show, Good Morning America or CBS This Morning                                 | 0.320        | <b>0.641</b> | 0.210        |
| Local television news about your viewing area                                            | -0.005       | <b>0.870</b> | 0.088        |
| Local newspapers (online or print)                                                       | 0.383        | <b>0.463</b> | 0.170        |
| FOX cable news programs (e.g., Sean Hannity, Fox & Friends)                              | 0.114        | 0.249        | <b>0.788</b> |
| Conservative news websites (e.g., Instapundit, Infowars)                                 | 0.409        | 0.048        | <b>0.782</b> |
| Conservative talk radio -- live radio, podcasts, streaming (e.g., Rush Limbaugh)         | 0.292        | 0.085        | <b>0.842</b> |
| Initial Eigenvalue                                                                       | 5.9          | 1.63         | 1.12         |
| Percent explained variance                                                               | 45.4%        | 12.54%       | 8.63%        |
| Cumulative percent                                                                       | 45.4%        | 57.94%       | 66.57%       |

## Measures

### Age

- What is your age?

### Gender

- What is your gender?
  - Male
  - Female

### Education

- What is the highest level of education you have completed?
  - Less than high school
  - High school graduate or GED
  - Some college (including tech/vocational, some community college, associate's degree)
  - Four year college degree/bachelor's degree
  - Some postgraduate or professional schooling; no postgraduate degree
  - Postgraduate or professional degree, including master's doctorate, medical or law degree

### Income

- What is your total household income?
  - Less than \$25000
  - \$25000 to \$49999
  - \$50000 to \$74999
  - \$75000 to \$99999
  - \$100000+

### Race

- Which of the following describes your race?
  - White
  - Black or African American
  - Asian
  - Hispanic
  - Other

### Political Interest

- In general, how interested are you in politics and national government?

## Political Efficacy

- Please rate how much you agree or disagree with the following statements:
  - People like me can influence government
  - I consider myself well qualified to participate in politics
  - I have a good understanding of the important political issues facing our country
  - No matter whom I vote for, it won't make a difference
  - People like me don't have any say in what the government does

## Political Ideology

- Generally speaking, do you usually think of yourself as a Republican, a Democrat, or an Independent? Please rate yourself on a scale where 0=Strong Republican and 10=Strong Democrat and 5=Independent
- On social issues, where would you place yourself on a scale of 0-10, where 0=Strong conservative and 10=Strong liberal?
- On economic issues, where would you place yourself on a scale of 0-10, where 0=Strong conservative and 10=Strong liberal

## Political Discussion

- During a typical month, how often do you discuss political issues with:
  - Friends and family
  - Co-workers and acquaintances
  - Strangers
  - People who agree with you
  - People who disagree with you
  - People outside your family who do not share your ethnicity, socio-economic status, or gender

## Media use

- Please indicate how often in the last week you've consumed content from each source (using any device, for example, your phone, your television, or your laptop):
  - National newspapers (e.g., The New York Times; Washington Post; online or print)
  - International news websites (e.g., BBC, The Guardian)
  - CNN cable news programs (e.g., Anderson Cooper, Don Lemon)
  - Liberal news websites (e.g., Daily Kos, Mother Jones)
  - MSNBC cable news programs (e.g., Rachel Maddow, Chris Matthews)
  - News programming on NPR -- live radio, podcasts, streaming (e.g., All Things Considered)
  - National nightly news on CBS, ABC, or NBC
  - The Today Show, Good Morning America or CBS This Morning
  - Local television news about your viewing area
  - Local newspapers (online or print)
  - FOX cable news programs (e.g., Sean Hannity, Fox & Friends)



- Conservative news websites (e.g., Instapundit, Infowars)
- Conservative talk radio -- live radio, podcasts, streaming (e.g., Rush Limbaugh)

#### Fact-checking familiarity

- How familiar or unfamiliar are you with the fact-checking movement in journalism, which includes such websites as Politifact and Factcheck.org?

#### Fact-checking attitudes

- In general, how do you feel about fact-checking sites like Politifact, Snopes, and others?

#### Perceived usefulness of fact-checking

- News stories that include reports on fact-checking are helpful to me

#### Visiting fact-checking sites

- How often did you go to any fact-checking websites during the presidential election to find out whether a statement about any of the candidates was accurate or not?
